# Supplementary material for: Telemedicine Services for the Arctic: A Systematic Review
Source: PubMed Central journal article supplement (PMC5508113; doi:10.2196/medinform.6323), 2017-06-28
Supplement: medinform_v5i2e16_app1.pdf [file medinform_v5i2e16_app1.pdf]

Table 1. Literature included in the study, sorted from the latest to the oldest.

| Reference | System/Company/<br>Project                                             | Type of<br>circumstance           | Communication<br>link                                                | Telemedicine<br>modalities                            | Telemedicine services                                                                     |
|-----------|------------------------------------------------------------------------|-----------------------------------|----------------------------------------------------------------------|-------------------------------------------------------|-------------------------------------------------------------------------------------------|
| [52]      | A real-time emergency telemedicine system                              | <sup>a</sup> Emergency or remote  | Red hybrid radio, modem Internet (ADSL, fiber optics, mobile phones) | Transmission of biomedical data                       | Telemonitoring, tele-ambulance                                                            |
| [46]      | Remote Health Care Strategy (RHC) (Shell's Medical Emergency Response) | Arctic or remote                  | Satellite                                                            | Still images, videoconferencing                       | Teleradiology, real-time video consultation, tele-ENT                                     |
| [63]      | Upstream Nigeria Telemedicine Pilot                                    | Emergency or remote               | Mobile                                                               | Vendor-NuPhysicia (video, still images)               | Real-time teleconsultation (ENT exam, discuss lab result, discuss prescribed medications) |
| [12]      | The future of Telemedicine in O&G, 2013                                | Emergency or remote and offshore  | <sup>b</sup> -----                                                   | Dedicated software                                    | Real-time data sharing and decision-making                                                |
| [64]      | Tele medical assistance services (TMAS)                                | Maritime or offshore              | Satellite                                                            | e-mail and still images                               | Tele dermatology                                                                          |
| [45]      | Statoil                                                                | Emergency or remote and offshore  | Private LAN or broadband                                             | Video conferencing                                    | Real-time teleconsultation and tele sonography                                            |
| [33]      | TCP (Saipem Telecardiology Program)                                    | Emergency or remote and offshore  | Dial-Up                                                              | Telephone and e-mail (written recommendations as PDF) | Telecardiology                                                                            |
| [41]      | Kashagan Project                                                       | Emergency or remote and offshore  | Satellite                                                            | Videoconferencing (Skype), e-mail, and still images   | Real-time teleconsultation, telecardiology                                                |
| [31]      | Centro Internazionale Radio Medico (CIRM)                              | Maritime or offshore              | Satellite                                                            | Radio and telephone, e-mail                           | Teleconsultation and Telemedical Maritime Assistance Service (TMAS)                       |
| [65]      | Eni Oil and Gas company                                                | Remote                            | GSM, PSTN, ISDN, LAN, satellite                                      | E-mail, telephone, still images                       | Telecardiology, asynchronous teleconsultation, real-time data sharing                     |
| [66]      | Emergency medical services (EMSs)                                      | Emergency                         | Local network (Peeq-Box) and a server (Asterisk, Digium Inc)         | Continuous audio, vital data, and video transmission  | Tele-EMS                                                                                  |
| [39]      | French Tele medical Assistance Service (TMAS)                          | Emergency or maritime or offshore | -----                                                                | Telephone, still images, videoconference with Skype   | Teleconsultation, telecardiology, real-time video consultation, telephone advice          |

<sup>a</sup> “or ,” is used when an article considers more than one circumstances, communication link, telemedicine modalities and telemedicine services.

<sup>b</sup> “-----” Depicts missing data or description in the article.

|              |                                                       |                                     |                                                                                        |                                                       |                                                                                                                                                                                                            |
|--------------|-------------------------------------------------------|-------------------------------------|----------------------------------------------------------------------------------------|-------------------------------------------------------|------------------------------------------------------------------------------------------------------------------------------------------------------------------------------------------------------------|
| ( [48 ,49] ) | Japan Syowa station                                   | Antarctica or , emergency or remote | Radiotelegraph, radio, satellite radio-telephone and satellite radio facsimile, mobile | E-mail, still and moving pictures (video)             | Real-time teleconsultation, teleradiology, teledermatology, tele-orthopedics, tele-ophthalmology, internal medicine, tele-urology, and teledentistry                                                       |
| [57]         | Emergency medical service (EMS)                       | Emergency or remote                 | Peeq-Box, P3 communication, mobile networks                                            | E-mail, video, audio, Still images, fax, vital data   | Teleconsultation, tele-EMS                                                                                                                                                                                 |
| [56]         | Sonography for Trauma examination                     | Emergency or remote                 | Radio                                                                                  | Video and 2-way radio                                 | Tele-ultrasound, telesonography                                                                                                                                                                            |
| [28]         | Tempus IC Telemedicine                                | Emergency or remote and offshore    | Satellite, Internet, or mobile                                                         | Voice, images, data, and video                        | -----                                                                                                                                                                                                      |
|              | InPlace Medical                                       | Emergency or remote and offshore    | -----                                                                                  | Videoconferencing, still image, and audio             | Teledermatology, tele-ENT                                                                                                                                                                                  |
| [44]         | Amazon Virtual Medical Team (AVMT)                    | Remote or maritime or offshore      | Satellite, mobile                                                                      | Videoconferencing (Skype), satellite phone, telephone | Telepresence, real-time teleconsultations                                                                                                                                                                  |
| [38]         | Scorpion Offshore                                     | Emergency or maritime or offshore   | Rig bandwidth                                                                          | Video conferencing                                    | Real-time specialty heart visit and urgent care visit (examine, manage, and treat), tele-ENT, teledermatology                                                                                              |
| [67]         | Aberdeen Royal Infirmary                              | Maritime or offshore                | NHS network                                                                            | E-mail, still images, and telephone                   | Electrocardiogram (ECG) interpretation and advice (TMAS)                                                                                                                                                   |
| [40]         | Alwyn North oil platform operated by Total            | Maritime or offshore                | Satellite                                                                              | Videoconferencing                                     | Real-time teleconsultation and telesonography                                                                                                                                                              |
| [55]         | Minor injuries telemedicine service (Aberdeen ED)     | Emergency                           | -----                                                                                  | Videoconferencing                                     | Teleconsultation                                                                                                                                                                                           |
| [37]         | Minimum medical emergency data-set (MMEDS)            | Remote                              | Virtual private network (VPN), mobiles                                                 | Data, SMS messages                                    | Real-time data sharing and decision-making                                                                                                                                                                 |
| [62]         | "Multi-purpose" and "all-weather" telemedicine system | Emergency or remote or offshore     | GSM, GPRS, Satellite and Plain Old Telephone System (POTS)                             | Still images                                          | Bidirectional telepointing capability, images, and real-time one ECG lead waveform transmission                                                                                                            |
| [60]         | (CDMA)-based emergency telemedicine system (CETS)     | Emergency or remote                 | CDMA-based networks (Mobile)                                                           | Bio signal transmission                               | Telemonitoring, tele-ambulance                                                                                                                                                                             |
| [61]         | Mobile telemedicine unit (MTU)                        | Emergency or Arctic                 | Mobile                                                                                 | Still images                                          | Teleradiology, tele-ECG, tele-electroencephalography, asynchronous teleconsultation                                                                                                                        |
| [47]         | British Antarctic Survey Medical Unit (BASMU)         | Antarctica or emergency or remote   | Radio telephone, satellite                                                             | Still images, e-mail, fax, telephone                  | Teleradiology, teledermatology, tele-interpretation, telespirometry, real-time consultation, real-time data sharing and decision-making, thrombolysis, real-time Telemonitoring, tele-education (training) |

|      |                                                              |                                           |                                                                         |                                                                         |                                                                                                                                 |
|------|--------------------------------------------------------------|-------------------------------------------|-------------------------------------------------------------------------|-------------------------------------------------------------------------|---------------------------------------------------------------------------------------------------------------------------------|
| [51] | Arctic health information and research                       | Arctic                                    | Satellite, mobile, radio                                                | Video conferencing                                                      | Tele-education (Training)                                                                                                       |
| [50] | Italian Antarctic Base at Terra Nova Bay                     | Antarctica or emergency or remote         | INMARSAT (Satellites), mobile phones, VPN                               | Medical data, still images, e-mail, fax, video                          | Videoconference, teleconsultation, teleradiology, on-line and off-line teleconsultation (ophthalmic, radiology, and orthopedic) |
| [32] | Aberdeen Royal Infirmary's accident and emergency department | Emergency or remote or offshore           | Radio                                                                   | Radio and telephone                                                     | Radio medical advice                                                                                                            |
| [59] | Moorfields Eye Hospital                                      | Accident and emergency                    | ----- (Not specified (384 kbits per second))                            | Videoconferencing, telephone                                            | Real-time teleconsultations, tele-ophthalmology                                                                                 |
| [58] | Aberdeen accident and emergency department                   | Accident and emergency or remote          | ISDN at 384 kbits per second                                            | Videoconferencing, still images                                         | Real-time teleconsultations, teleradiology                                                                                      |
| [68] | Military treatment facilities (MTFs)                         | Maritime or offshore                      | NMCS ( "hub-and-spoke")                                                 | Videoconferencing                                                       | ENT teleconsultations                                                                                                           |
| [34] | MERMAID                                                      | Remote or maritime, offshore or emergency | ISDN, digital land lines, cellular or wireless, satellite and broadband | Videoconferencing                                                       | Tele-education (Training)                                                                                                       |
| [4]  | Alaska Telemedicine Project                                  | Arctic or remote                          | Single-side band radio, satellite radio, and television                 | Videoconferencing, medical messaging and internet, e-mail, still images | Clinical decision-support, teleradiology, tele-ENT and dermatology                                                              |
|      | Turku University hospital                                    | Arctic or remote                          | ISDN                                                                    | Still images                                                            | Teleradiology                                                                                                                   |
|      | Greenland                                                    | Arctic                                    | -----                                                                   | Video, still images                                                     | Videoconsultations, teleradiology                                                                                               |
|      | Arkhangelsk Region (PC-based system)                         | Arctic or remote                          | -----                                                                   | Still images, audio-telephone                                           | Teleconsultations, tele-education (Training)                                                                                    |
| [43] | Mount Logan and Mount McKinley Telemedicine Projects         | Arctic or remote                          | Mobile satellite communication                                          | Physiological data                                                      | Telemonitoring                                                                                                                  |
|      | Baffin Telehealth Project                                    | Arctic or remote                          | Satellite                                                               | Video, still images                                                     | Real-time teleconsultation, videoconferencing, digital imaging, and various medical diagnostics                                 |
| [35] | MERMAID                                                      | Remote or maritime, offshore or emergency | ISDN, digital land lines, cellular/wireless, satellite, and broadband   | Videoconferencing, audio, multimedia, flat files, and still images      | Telepresence, real-time teleconsultations                                                                                       |
| [26] | MERMAID                                                      | Remote or maritime, offshore or emergency | ISDN, digital land lines, cellular/wireless, satellite, and broadband   | Videoconferencing, audio, multimedia, flat files, and still images      | Telepresence, real-time teleconsultations                                                                                       |

## Reference

4. Hild M. Arctic Telemedicine Project Final Report. Presented to the Sustainable Development Working Group of the Arctic Council. Institute for Circumpolar Health Studies, University of Alaska Anchorage: Anchorage, Alaska 2000:97. URL: <http://hdl.handle.net/11374/27>.
12. Thorvik K, Nystad A, Fernandes A, Reegard K, Simensen J, Rindahl G, Silva E, Bergsland T, Klingsheim O, Evjemo T. The future of telemedicine in O&G. SPE Intelligent Energy Conference & Exhibition; 1-3 April 2014; Utrecht, The Netherlands: Society of Petroleum Engineers; 2014. doi: [10.2118/167841-ms](https://doi.org/10.2118/167841-ms).
26. Anogianakis G, Maglavera S, Pomportsis A. Relief for maritime medical emergencies through telematics. IEEE Transactions on Information Technology in Biomedicine. 1998;2(4):254-60. doi: [10.1109/4233.737580](https://doi.org/10.1109/4233.737580).
28. Anscombe DL. Healthcare delivery for oil rig workers: telemedicine plays a vital role. Telemedicine journal and e-health: the official journal of the American Telemedicine Association. 2010;16(6):659-63. doi: [10.1089/tmj.2010.9957](https://doi.org/10.1089/tmj.2010.9957). PubMed PMID: [20690836](https://pubmed.ncbi.nlm.nih.gov/20690836/).
31. Amenta F, Capone L, Sibilio F. Telemedical Assistance of Patients on Board Ships Activity of Centro Internazionale Radio Medico (CIRM), the Italian Telemedical Maritime Assistance Service (TMAS). 2013. URL: [http://www.cirm.it/documenti/cirm\\_th3-1.pdf](http://www.cirm.it/documenti/cirm_th3-1.pdf) [accessed 2017-06-05] [[WebCite Cache ID 6qzOLTH3p](#)]
32. Aujla K, Nag R, Ferguson J, Howell M, Cahill C. Rationalizing radio medical advice for maritime emergencies. Journal of Telemedicine and Telecare. 2003;9(1\_suppl):12-4. doi: [10.1258/135763303322196178](https://doi.org/10.1258/135763303322196178). PubMed PMID: [12952706](https://pubmed.ncbi.nlm.nih.gov/12952706/).
33. Panait DC, Mika F. Tele-Cardiology in Remote O&G Premises. European HSE Conference and Exhibition; 2013/4/16/; London, United Kingdom. SPE: Society of Petroleum Engineers; 2013. doi: [10.2118/164984-ms](https://doi.org/10.2118/164984-ms).
34. Anogianakis G, Maglavera S. Utilising multimedia for training merchant mariners as paramedics. User Acceptance of Health Telematics Applications. 2000; 72:66-72. doi: [10.3233/978-1-60750-916-5-66](https://doi.org/10.3233/978-1-60750-916-5-66). PubMed PMID: [WOS:000086539700010](https://pubmed.ncbi.nlm.nih.gov/WOS:000086539700010/).
35. Anogianakis G, Maglavera S, Pomportsis A, Bountzioukas S, Beltrame F, Orsi G. Medical emergency aid through telematics: design, implementation guidelines and analysis of user requirements for the MERMAID project. International Journal of Medical Informatics. 1998;52(1):93-103. doi: [10.1016/s1386-5056\(98\)00128-2](https://doi.org/10.1016/s1386-5056(98)00128-2).
37. Anogeianaki A, Papaliagkas V, Guibas G, Anogianakis G. Telemedicine services across the Greek-Bulgarian border. Journal of Telemedicine and Telecare. 2007;13(3\_suppl):1-3. doi: [10.1258/135763307783247248](https://doi.org/10.1258/135763307783247248).
38. Boultinghouse OW, Fitts Jr TG. Telemedicine technologies enhance offshore healthcare, reduce illness-related departures. Drilling contractor. 2009. URL: <http://www.drillingcontractor.org/telemedicine-technologies-enhance-offshore-healthcare-reduce-illness-related-departures-1853> [accessed 2017-05-26] [[WebCite Cache ID 6qkkKUSKg](#)]
39. Dehours E, Vallé B, Bounes V, Girardi C, Tabarly J, Concina F, Pujos M, Ducassé J-L. User satisfaction with maritime telemedicine. Journal of Telemedicine and Telecare. 2012;18(4):189-92. doi: [10.1258/jtt.2012.110910](https://doi.org/10.1258/jtt.2012.110910). PubMed PMID: [22604271](https://pubmed.ncbi.nlm.nih.gov/22604271/).
40. Mair F, Fraser S, Ferguson J, Webster K. Telemedicine via satellite to support offshore oil platforms. Journal of Telemedicine and Telecare. 2008;14(3):129-31. doi: [10.1258/jtt.2008.003008](https://doi.org/10.1258/jtt.2008.003008). PubMed PMID: [18430278](https://pubmed.ncbi.nlm.nih.gov/18430278/).
41. Kevlishvili G, Mika F, De Sanctis S. Trial Teleconsultation Sessions On Castoro 12 In North Caspian Sea. SPE European Health, Safety and Environmental Conference in Oil and Gas Exploration and Production; 2011/1/1/; Vienna, Austria. SPE: Society of Petroleum Engineers; 2011. doi: [10.2118/140501-ms](https://doi.org/10.2118/140501-ms).
43. Otto CA. Telemedicine in the Canadian high Arctic and other remote environments. In: Engineering in Medicine and Biology 21st Annual Conference and the 1999 Annual Fall Meeting of the Biomedical Engineering Society BMES/EMBS Conference.: IEEE; 1999 Presented at: Proceedings of the First Joint BMES/EMBS Conference. 1999 IEEE Engineering in Medicine and Biology 21st Annual Conference and the 1999 Annual Fall Meeting of the Biomedical Engineering Society (Cat. N; October 1999; Atlanta, GA URL: <http://ieeexplore.ieee.org/document/803864/> [doi: [10.1109/IEMBS.1999.803864](https://doi.org/10.1109/IEMBS.1999.803864)]
44. Latifi R, Stanonik Mde L, Merrell RC, Weinstein RS. Telemedicine in extreme conditions: supporting the Martin Strel Amazon Swim Expedition. Telemedicine journal and e-health: the official journal of the

- American Telemedicine Association. 2009;15(1):93-100. doi: [10.1089/tmj.2008.0057](https://doi.org/10.1089/tmj.2008.0057). PubMed PMID: [19199853](https://pubmed.ncbi.nlm.nih.gov/19199853/).
45. Todnem K, Evensen A, Oveland N. The implementation of telemedicine as an integrated part of the health service on the Statoil operated installations on the Norwegian continental shelf (NCS). International Conference on Health, Safety and Environment in Oil and Gas Exploration and Production; 2012/1/1/; Perth, Australia. SPE: Society of Petroleum Engineers; 2012. doi: [10.2118/157562-ms](https://doi.org/10.2118/157562-ms).
  46. Berg J, Toner S, Stilz R, Klein S, Williams H, Pearson J, Fraser A, Norman N. Remote Health Care: A Game Changer for the Arctic. OTC Arctic Technology Conference; 2015 2015/3/23/; Copenhagen, Denmark. OTC: Offshore Technology Conference. doi: [10.4043/25549-ms](https://doi.org/10.4043/25549-ms).
  47. Grant IC. Telemedicine in the British Antarctic survey. International Journal of Circumpolar Health. 2004;63(4):356-64. PMID:[15709312](https://pubmed.ncbi.nlm.nih.gov/15709312/).
  48. Ohno G. Practical Results of Telemedicine System Between Antarctic Station and Japan. In: Grasczew G, Rakowsky S. Telemedicine Techniques and Applications. Rijeka: InTech; 2011. p. Ch. 21.
  49. Ohno G, Watanabe K, Okada Y, Higuchi K. Practical experience of telehealth between an Antarctic station and Japan. Journal of Telemedicine and Telecare. 2012;18(8):473-5. doi: [10.1258/jtt.2012.GTH111](https://doi.org/10.1258/jtt.2012.GTH111). PubMed PMID: [23209273](https://pubmed.ncbi.nlm.nih.gov/23209273/).
  50. Pillon S, Todini AR. eHealth in Antarctica: a model ready to be transferred to every-day life. International Journal of Circumpolar Health. 2004;63(4):436-42. PMID: [15709319](https://pubmed.ncbi.nlm.nih.gov/15709319/).
  51. Hild C. Arctic telehealth: North to the future. International Journal of Circumpolar Health. 2004;63(sup2):63-70. PMID:[15736624](https://pubmed.ncbi.nlm.nih.gov/15736624/).
  52. Castellano NN, Gazquez JA, García Salvador RM, Gracia-Escudero A, Fernandez-Ros M, Manzano-Agugliaro F. Design of a real-time emergency telemedicine system for remote medical diagnosis. Biosystems Engineering. 2015; 138:23-32. doi: [10.1016/j.biosystemseng.2015.03.017](https://doi.org/10.1016/j.biosystemseng.2015.03.017).
  55. Miller DR, Alam K, Fraser S, Ferguson J. The delivery of a minor injuries telemedicine service by Emergency Nurse Practitioners. Journal of Telemedicine and Telecare. 2008;14(3):143-4. doi: [10.1258/jtt.2008.003013](https://doi.org/10.1258/jtt.2008.003013). PubMed PMID: [18430283](https://pubmed.ncbi.nlm.nih.gov/18430283/).
  56. Boniface KS, Shokoohi H, Smith ER, Scantlebury K. Tele-ultrasound and paramedics: real-time remote physician guidance of the Focused Assessment with Sonography for Trauma examination. The American Journal of Emergency Medicine. 2011;29(5):477-81. doi: [10.1016/j.ajem.2009.12.001](https://doi.org/10.1016/j.ajem.2009.12.001). PubMed PMID: [20825815](https://pubmed.ncbi.nlm.nih.gov/20825815/).
  57. Bergrath S, Reich A, Rossaint R, Rörtgen D, Gerber J, Fischermann H, Beckers SK, Brokmann JC, Schulz JB, Leber C, Fitzner C, Skorning M. Feasibility of Prehospital Teleconsultation in Acute Stroke – A Pilot Study in Clinical Routine. PLoS ONE. 2012;7(5): e36796. doi: [10.1371/journal.pone.0036796](https://doi.org/10.1371/journal.pone.0036796). PubMed PMID: [22629331](https://pubmed.ncbi.nlm.nih.gov/22629331/); PubMed Central PMCID: PMC3356340.
  58. Brebner EM, Brebner JA, Ruddick-Bracken H, Wootton R, Ferguson J. Evaluation of a Pilot Telemedicine Network for Accident and Emergency Work. Journal of Telemedicine and Telecare. 2002;8(2\_suppl):5-6. doi: [10.1258/135763302320301803](https://doi.org/10.1258/135763302320301803). PubMed PMID: [12217114](https://pubmed.ncbi.nlm.nih.gov/12217114/).
  59. Bowman RJ, Kennedy C, Kirwan JF, Sze P, Murdoch IE. Reliability of telemedicine for diagnosing and managing eye problems in accident and emergency departments. Eye. 2003;17(6):743-6. doi: [10.1038/sj.eye.6700489](https://doi.org/10.1038/sj.eye.6700489). PubMed PMID: [12928688](https://pubmed.ncbi.nlm.nih.gov/12928688/).
  60. Kang J, Chun H, Shin IH, Shin SD, Suh GJ, Kim HC. Preliminary evaluation of the use of a CDMA-based emergency telemedicine system. Journal of Telemedicine and Telecare. 2006;12(8):422-7. doi: [10.1258/135763306779378744](https://doi.org/10.1258/135763306779378744). PubMed PMID: [17227609](https://pubmed.ncbi.nlm.nih.gov/17227609/).
  61. Uldal SB, Amerkhanov J, Manankova Bye S, Mokeev A, Norum J. A mobile telemedicine unit for emergency and screening purposes: experience from north-west Russia. Journal of Telemedicine and Telecare. 2004;10(1):11-5. doi: [10.1258/135763304322764121](https://doi.org/10.1258/135763304322764121). PubMed PMID: [15006209](https://pubmed.ncbi.nlm.nih.gov/15006209/).
  62. Kyriacou E, Pavlopoulos S, Koutsouris D. An Emergency Telemedicine System Based on Wireless Communication Technology: A Case Study. In: Istepanian RSH, Laxminarayan S, Pattichis CS, editors. M-Health: Emerging Mobile Health Systems. Boston, MA: Springer US; 2006. p. 401-16.
  63. Dim S, Aliyu B. Upstream Nigeria Telemedicine Pilot Program. SPE International Conference on Health, Safety, and Environment; 2014/3/17/; Long Beach, California, USA. SPE: Society of Petroleum Engineers; 2014. doi: [10.2118/168565-ms](https://doi.org/10.2118/168565-ms).
  64. Dahl E. Briefing notes on maritime teledermatology. Int Marit Health. 2014;65(2):61-4. doi: [10.5603/IMH.2014.0014](https://doi.org/10.5603/IMH.2014.0014). PubMed PMID: [25231327](https://pubmed.ncbi.nlm.nih.gov/25231327/).

65. Mortara S, Uberti F, Gomez G, editors. Telemedicine in O&G Industry: Our Experience (Russian). SPE Russian Oil and Gas Technical Conference and Exhibition; 2008 2008/1/1/; Moscow, Russia. SPE: Society of Petroleum Engineers. doi: [10.2118/115505-ru](https://doi.org/10.2118/115505-ru).
66. Rörtgen D, Bergrath S, Rossaint R, Beckers SK, Fischermann H, Na I-S, Peters D, Fitzner C, Skorning M. Comparison of physician staffed emergency teams with paramedic teams assisted by telemedicine – a randomized, controlled simulation study. Resuscitation. 2013;84(1):85-92. doi: [10.1016/j.resuscitation.2012.06.012](https://doi.org/10.1016/j.resuscitation.2012.06.012). PubMed PMID: [22750663](https://pubmed.ncbi.nlm.nih.gov/22750663/).
67. Webster K, Fraser S, Mair F, Ferguson J. A low-cost decision support network for electrocardiograph transmission from oil rigs in the North Sea. Journal of Telemedicine and Telecare. 2008;14(3):162-4. doi: [10.1258/jtt.2008.003021](https://doi.org/10.1258/jtt.2008.003021). PubMed PMID: [18430291](https://pubmed.ncbi.nlm.nih.gov/18430291/).
68. Melcer T, Hunsaker D, Crann B, Caola L, Deniston W. A prospective evaluation of ENT telemedicine in remote military populations seeking specialty care. Telemedicine journal and e-health: the official journal of the American Telemedicine Association. 2002;8(3):301-11. doi: [10.1089/15305620260353199](https://doi.org/10.1089/15305620260353199). PubMed PMID: [12419024](https://pubmed.ncbi.nlm.nih.gov/12419024/).
